# Supplementary material for: Genome-wide association study of response to tumour necrosis factor inhibitor therapy in rheumatoid arthritis
Source: PubMed Central journal article supplement (PMC6150911; doi:10.1038/s41397-018-0040-6), 2018-08-31
Supplement: 41397_2018_40_MOESM1_ESM.pdf [file 41397_2018_40_MOESM1_ESM.pdf]

## Supplementary Table 1

The number of samples genotyped and the genotyping arrays used for the current study

| <b>Imputation group</b>              | <b>n</b>    | <b>Number of SNPs</b> |
|--------------------------------------|-------------|-----------------------|
| <i>Affymetrix group</i>              | <b>825</b>  | 272 006               |
| Affymetrix_5/6                       | 577         |                       |
| Affymetrix_6                         | 248         |                       |
| <i>Illumina Omni-HumanCore group</i> | <b>834</b>  | 204 894               |
| Illumina_CoreExome                   | 330         |                       |
| Illumina_OmniExpress                 | 504         |                       |
| <i>Illumina HumanHap group</i>       | <b>111</b>  | 460 812               |
| Illumina_550                         | 41          |                       |
| Illumina_550/650                     | 70          |                       |
| <b>Total</b>                         | <b>1770</b> |                       |

## Supplementary Table 2

Association analysis results ( $p < 1 \times 10^{-7}$ ) for variants with MAF  $\leq$  5% but  $\geq$  1%

| Pheno              | TNFi       | Gene region                       | SNP         | Chr | BP        | A1 | A2 | Genotype counts | MAF   | P        | Beta  | SE   |
|--------------------|------------|-----------------------------------|-------------|-----|-----------|----|----|-----------------|-------|----------|-------|------|
| <b>MAF &lt; 5%</b> |            |                                   |             |     |           |    |    |                 |       |          |       |      |
| SJC28              | All        | intronic CSMD3                    | rs150537045 | 8   | 114407100 | G  | A  | 1669/54/0       | 0.016 | 1.71E-08 | -0.50 | 0.09 |
| SJC28              | Infliximab | intronic RAD51B                   | rs140825531 | 14  | 68488674  | G  | A  | 425/9/0         | 0.010 | 6.09E-10 | -1.44 | 0.23 |
| SJC28              | Infliximab | intergenic LOC286114/LOC101929172 | rs10097964  | 8   | 20982903  | G  | A  | 425/9/0         | 0.010 | 3.80E-08 | -1.28 | 0.23 |
| SJC28              | Infliximab | intergenic CADM2/VGLL3            | rs114456288 | 3   | 86497394  | G  | T  | 425/8/1         | 0.012 | 5.29E-08 | -1.10 | 0.20 |
| SJC28              | Etanercept | intergenic ADGRL4/LOC101927412    | rs76668869  | 1   | 80979421  | G  | C  | 598/18/3        | 0.019 | 1.60E-11 | -0.75 | 0.11 |
| SJC28              | Etanercept | intergenic FAR1/SPON1             | rs78078856  | 11  | 13758792  | T  | A  | 605/14/0        | 0.011 | 1.57E-08 | -0.91 | 0.16 |
| SJC28              | Adalimumab | intronic KIAA0391                 | rs2295463   | 14  | 35736273  | C  | T  | 534/17/0        | 0.015 | 3.18E-08 | -0.84 | 0.15 |
| SJC28              | Adalimumab | intronic DLG2                     | rs117214796 | 11  | 84871677  | T  | C  | 535/16/0        | 0.015 | 3.50E-08 | -0.86 | 0.16 |
| SJC28              | Adalimumab | intronic NEBL                     | rs74807419  | 10  | 21340093  | C  | G  | 534/14/3        | 0.018 | 5.99E-08 | -0.66 | 0.12 |
| SJC28              | Adalimumab | intronic EMCN                     | rs34619498  | 4   | 101426732 | T  | C  | 523/28/0        | 0.025 | 7.92E-08 | -0.64 | 0.12 |
| ESR                | Adalimumab | intergenic LINC00845/TMEM26       | rs140142800 | 10  | 62796237  | C  | T  | 464/23/0        | 0.024 | 6.18E-08 | -0.79 | 0.15 |
| TJC28              | Etanercept | intronic NAV2                     | rs78368496  | 11  | 19984329  | A  | G  | 586/32/1        | 0.027 | 4.15E-08 | -0.69 | 0.13 |
| TJC28              | Adalimumab | intergenic MIR4277/MRPL36         | rs147859879 | 5   | 1729788   | G  | C  | 533/18/0        | 0.016 | 4.43E-09 | -1.00 | 0.17 |
| TJC28              | Adalimumab | intronic GABBR2                   | rs337527    | 9   | 101447963 | T  | C  | 538/12/1        | 0.013 | 6.50E-08 | -0.98 | 0.18 |

### Supplementary Table 3

Association of all variants with  $p < 1 \times 10^{-7}$  in one phenotype (in **bold**), across other phenotypes where  $p < 0.01$ . Low frequency variants are in red.

| SNP                | Chr | A1 | SNP location           | Genotype Counts | MAF          | P        | Beta        | Phenotype | TNFi       |
|--------------------|-----|----|------------------------|-----------------|--------------|----------|-------------|-----------|------------|
| <b>rs10097964</b>  | 8   | G  | LOC286114,LOC101929172 | 425/9/0         | <b>0.010</b> | 3.80E-08 | -1.28       | deltasjc  | infliximab |
| rs10097964         | 8   | G  | LOC286114,LOC101929172 | 425/9/0         | <b>0.010</b> | 7.12E-05 | -1.07       | deltatjc  | infliximab |
| rs10097964         | 8   | G  | LOC286114,LOC101929172 | 432/9/0         | <b>0.010</b> | 6.05E-04 | -1.11       | deltadas  | infliximab |
| rs10097964         | 8   | G  | LOC286114,LOC101929172 | 1677/46/0       | <b>0.013</b> | 6.44E-04 | -0.33       | deltasjc  | all        |
| <b>rs10739537</b>  | 9   | G  | BRINP1,LINC01613       | 70/275/206      | 0.377        | 9.11E-08 | -0.21       | deltasjc  | adalimumab |
| rs10739537         | 9   | G  | BRINP1,LINC01613       | 70/275/206      | 0.377        | 2.85E-04 | -0.17       | deltatjc  | adalimumab |
| <b>rs114456288</b> | 3   | G  | CADM2,VGLL3            | 425/8/1         | <b>0.012</b> | 5.29E-08 | -1.10       | deltasjc  | infliximab |
| rs114456288        | 3   | G  | CADM2,VGLL3            | 425/8/1         | <b>0.012</b> | 5.46E-04 | -0.80       | deltatjc  | infliximab |
| rs114456288        | 3   | G  | CADM2,VGLL3            | 1669/39/1       | <b>0.012</b> | 2.80E-03 | -0.39       | deltapga  | all        |
| rs114456288        | 3   | G  | CADM2,VGLL3            | 417/8/1         | <b>0.012</b> | 4.70E-03 | -0.69       | deltapga  | infliximab |
| rs114456288        | 3   | G  | CADM2,VGLL3            | 431/9/1         | <b>0.012</b> | 4.98E-03 | -0.76       | deltadas  | infliximab |
| rs114456288        | 3   | G  | CADM2,VGLL3            | 537/12/0        | <b>0.011</b> | 9.57E-03 | <u>0.62</u> | deltaesr  | etanercept |
| <b>rs11599217</b>  | 10  | G  | C10orf90,DOCK1         | 128/210/96      | 0.463        | 7.27E-08 | -0.29       | deltatjc  | infliximab |
| rs11599217         | 10  | G  | C10orf90,DOCK1         | 130/214/97      | 0.463        | 5.04E-06 | -0.29       | deltadas  | infliximab |
| rs11599217         | 10  | G  | C10orf90,DOCK1         | 126/206/94      | 0.462        | 2.14E-03 | -0.17       | deltapga  | infliximab |
| rs11599217         | 10  | G  | C10orf90,DOCK1         | 128/210/96      | 0.463        | 7.14E-03 | -0.13       | deltasjc  | infliximab |
| rs11599217         | 10  | G  | C10orf90,DOCK1         | 417/791/306     | 0.463        | 8.60E-03 | -0.08       | deltaesr  | all        |
| <b>rs117214796</b> | 11  | T  | DLG2                   | 535/16/0        | <b>0.015</b> | 3.50E-08 | -0.86       | deltasjc  | adalimumab |
| rs117214796        | 11  | T  | DLG2                   | 535/16/0        | <b>0.015</b> | 4.80E-05 | -0.74       | deltatjc  | adalimumab |
| rs117214796        | 11  | T  | DLG2                   | 1687/36/0       | <b>0.010</b> | 3.36E-04 | -0.39       | deltasjc  | all        |
| rs117214796        | 11  | T  | DLG2                   | 1687/36/0       | <b>0.010</b> | 4.24E-03 | -0.36       | deltatjc  | all        |
| <b>rs140142800</b> | 10  | C  | LINC00845,TMEM26       | 464/23/0        | <b>0.024</b> | 6.18E-08 | -0.79       | deltaesr  | adalimumab |
| rs140142800        | 10  | C  | LINC00845,TMEM26       | 476/24/0        | <b>0.024</b> | 3.99E-03 | -0.53       | deltadas  | adalimumab |
| rs140142800        | 10  | C  | LINC00845,TMEM26       | 1433/80/1       | <b>0.027</b> | 4.11E-03 | -0.26       | deltaesr  | all        |
| rs140142800        | 10  | C  | LINC00845,TMEM26       | 522/29/0        | <b>0.026</b> | 8.85E-03 | -0.31       | deltasjc  | adalimumab |
| <b>rs140825531</b> | 14  | G  | RAD51B                 | 425/9/0         | <b>0.010</b> | 6.09E-10 | -1.44       | deltasjc  | infliximab |
| rs140825531        | 14  | G  | RAD51B                 | 1670/53/0       | <b>0.015</b> | 9.27E-05 | -0.35       | deltasjc  | all        |
| rs140825531        | 14  | G  | RAD51B                 | 1522/47/0       | <b>0.015</b> | 1.11E-04 | -0.53       | deltadas  | all        |
| rs140825531        | 14  | G  | RAD51B                 | 1658/51/0       | <b>0.015</b> | 1.14E-03 | -0.39       | deltapga  | all        |
| rs140825531        | 14  | G  | RAD51B                 | 1670/53/0       | <b>0.015</b> | 3.51E-03 | -0.31       | deltatjc  | all        |
| rs140825531        | 14  | G  | RAD51B                 | 417/9/0         | <b>0.011</b> | 4.01E-03 | -0.81       | deltapga  | infliximab |
| rs140825531        | 14  | G  | RAD51B                 | 432/9/0         | <b>0.010</b> | 6.33E-03 | -0.88       | deltadas  | infliximab |
| rs140825531        | 14  | G  | RAD51B                 | 480/20/0        | <b>0.020</b> | 9.31E-03 | -0.52       | deltadas  | adalimumab |
| <b>rs147859879</b> | 5   | G  | MIR4277,MRPL36         | 533/18/0        | <b>0.016</b> | 4.43E-09 | -1.00       | deltatjc  | adalimumab |
| rs147859879        | 5   | G  | MIR4277,MRPL36         | 533/18/0        | <b>0.016</b> | 1.60E-05 | -0.63       | deltasjc  | adalimumab |
| rs147859879        | 5   | G  | MIR4277,MRPL36         | 484/16/0        | <b>0.016</b> | 5.57E-05 | -0.90       | deltadas  | adalimumab |
| rs147859879        | 5   | G  | MIR4277,MRPL36         | 1680/43/0       | <b>0.012</b> | 1.35E-03 | -0.32       | deltasjc  | all        |
| rs147859879        | 5   | G  | MIR4277,MRPL36         | 531/18/0        | <b>0.016</b> | 3.30E-03 | -0.59       | deltapga  | adalimumab |
| rs147859879        | 5   | G  | MIR4277,MRPL36         | 1680/43/0       | <b>0.012</b> | 5.04E-03 | -0.33       | deltatjc  | all        |
| rs147859879        | 5   | G  | MIR4277,MRPL36         | 1531/38/0       | <b>0.012</b> | 7.16E-03 | -0.41       | deltadas  | all        |
| <b>rs150537045</b> | 8   | G  | CSMD3                  | 1669/54/0       | <b>0.016</b> | 1.71E-08 | -0.50       | deltasjc  | all        |
| rs150537045        | 8   | G  | CSMD3                  | 526/25/0        | <b>0.023</b> | 7.89E-06 | -0.56       | deltasjc  | adalimumab |
| rs150537045        | 8   | G  | CSMD3                  | 526/25/0        | <b>0.023</b> | 1.88E-04 | -0.55       | deltatjc  | adalimumab |

Continued...

Supplementary Table 3 continued

| SNP               | Chr | A1 | SNP location        | Genotype Counts | MAF   | P        | Beta  | Phenotype | TNFi       |
|-------------------|-----|----|---------------------|-----------------|-------|----------|-------|-----------|------------|
| rs150537045       | 8   | G  | CSMD3               | 420/14/0        | 0.016 | 1.00E-03 | -0.62 | deltasjc  | infliximab |
| rs150537045       | 8   | G  | CSMD3               | 478/22/0        | 0.022 | 1.53E-03 | -0.61 | deltadas  | adalimumab |
| rs150537045       | 8   | G  | CSMD3               | 1669/54/0       | 0.016 | 1.58E-03 | -0.33 | deltatjc  | all        |
| rs150537045       | 8   | G  | CSMD3               | 1517/52/0       | 0.017 | 2.19E-03 | -0.40 | deltadas  | all        |
| <b>rs2187874</b>  | 4   | G  | ZNF595,ZNF718       | 1279/397/47     | 0.142 | 7.00E-08 | -0.19 | deltatjc  | all        |
| rs2187874         | 4   | G  | ZNF595,ZNF718       | 1279/397/47     | 0.142 | 4.51E-05 | -0.12 | deltasjc  | all        |
| rs2187874         | 4   | G  | ZNF595,ZNF718       | 1163/363/43     | 0.143 | 1.26E-04 | -0.18 | deltadas  | all        |
| rs2187874         | 4   | G  | ZNF595,ZNF718       | 464/135/20      | 0.141 | 5.09E-04 | -0.20 | deltatjc  | etanercept |
| rs2187874         | 4   | G  | ZNF595,ZNF718       | 313/105/16      | 0.158 | 3.02E-03 | -0.21 | deltatjc  | infliximab |
| rs2187874         | 4   | G  | ZNF595,ZNF718       | 313/105/16      | 0.158 | 6.68E-03 | -0.17 | deltasjc  | infliximab |
| rs2187874         | 4   | G  | ZNF595,ZNF718       | 1271/391/47     | 0.142 | 6.85E-03 | -0.11 | deltapga  | all        |
| <b>rs2295463</b>  | 14  | C  | KIAA0391            | 534/17/0        | 0.015 | 3.18E-08 | -0.84 | deltasjc  | adalimumab |
| rs2295463         | 14  | C  | KIAA0391            | 485/15/0        | 0.015 | 1.70E-05 | -0.99 | deltadas  | adalimumab |
| rs2295463         | 14  | C  | KIAA0391            | 534/17/0        | 0.015 | 6.95E-04 | -0.60 | deltatjc  | adalimumab |
| rs2295463         | 14  | C  | KIAA0391            | 532/17/0        | 0.015 | 7.23E-03 | -0.55 | deltapga  | adalimumab |
| <b>rs337527</b>   | 9   | T  | GABBR2              | 538/12/1        | 0.013 | 6.50E-08 | -0.98 | deltatjc  | adalimumab |
| rs337527          | 9   | T  | GABBR2              | 488/11/1        | 0.013 | 2.46E-05 | -0.97 | deltadas  | adalimumab |
| rs337527          | 9   | T  | GABBR2              | 538/12/1        | 0.013 | 3.98E-04 | -0.55 | deltasjc  | adalimumab |
| <b>rs34619498</b> | 4   | T  | EMCN                | 523/28/0        | 0.025 | 7.92E-08 | -0.64 | deltasjc  | adalimumab |
| <b>rs7195994</b>  | 16  | G  | FTO                 | 363/68/3        | 0.085 | 9.74E-09 | -0.48 | deltasjc  | infliximab |
| rs7195994         | 16  | G  | FTO                 | 369/69/3        | 0.085 | 4.28E-05 | -0.48 | deltadas  | infliximab |
| rs7195994         | 16  | G  | FTO                 | 363/68/3        | 0.085 | 1.01E-04 | -0.38 | deltatjc  | infliximab |
| rs7195994         | 16  | G  | FTO                 | 1290/269/10     | 0.092 | 9.39E-04 | -0.19 | deltadas  | all        |
| rs7195994         | 16  | G  | FTO                 | 1414/297/12     | 0.093 | 1.89E-03 | -0.14 | deltatjc  | all        |
| rs7195994         | 16  | G  | FTO                 | 1414/297/12     | 0.093 | 2.25E-03 | -0.12 | deltasjc  | all        |
| <b>rs74807419</b> | 10  | C  | NEBL                | 534/14/3        | 0.018 | 5.99E-08 | -0.66 | deltasjc  | adalimumab |
| rs74807419        | 10  | C  | NEBL                | 534/14/3        | 0.018 | 5.74E-05 | -0.57 | deltatjc  | adalimumab |
| rs74807419        | 10  | C  | NEBL                | 1672/47/4       | 0.016 | 7.54E-04 | -0.28 | deltasjc  | all        |
| rs74807419        | 10  | C  | NEBL                | 1672/47/4       | 0.016 | 4.66E-03 | -0.27 | deltatjc  | all        |
| <b>rs76668869</b> | 1   | G  | ADGRL4,LOC101927412 | 598/18/3        | 0.019 | 1.60E-11 | -0.75 | deltasjc  | etanercept |
| rs76668869        | 1   | G  | ADGRL4,LOC101927412 | 598/18/3        | 0.019 | 7.59E-06 | -0.61 | deltatjc  | etanercept |
| rs76668869        | 1   | G  | ADGRL4,LOC101927412 | 543/18/3        | 0.021 | 2.01E-04 | -0.63 | deltadas  | etanercept |
| rs76668869        | 1   | G  | ADGRL4,LOC101927412 | 1639/79/5       | 0.026 | 1.82E-03 | -0.21 | deltasjc  | all        |
| <b>rs78078856</b> | 11  | T  | FAR1,SPON1          | 605/14/0        | 0.011 | 1.57E-08 | -0.91 | deltasjc  | etanercept |
| rs78078856        | 11  | T  | FAR1,SPON1          | 605/14/0        | 0.011 | 6.85E-06 | -0.90 | deltatjc  | etanercept |
| rs78078856        | 11  | T  | FAR1,SPON1          | 550/14/0        | 0.012 | 1.59E-03 | -0.78 | deltadas  | etanercept |
| rs78078856        | 11  | T  | FAR1,SPON1          | 1682/41/0       | 0.012 | 2.27E-03 | -0.31 | deltasjc  | all        |
| rs78078856        | 11  | T  | FAR1,SPON1          | 1682/41/0       | 0.012 | 3.07E-03 | -0.35 | deltatjc  | all        |
| <b>rs78368496</b> | 11  | A  | NAV2                | 586/32/1        | 0.027 | 4.15E-08 | -0.69 | deltatjc  | etanercept |
| rs78368496        | 11  | A  | NAV2                | 586/32/1        | 0.027 | 1.01E-03 | -0.34 | deltasjc  | etanercept |
| rs78368496        | 11  | A  | NAV2                | 1594/126/3      | 0.038 | 6.31E-03 | -0.18 | deltatjc  | all        |
| <b>rs948138</b>   | 11  | G  | MMP20,MMP27         | 132/292/191     | 0.452 | 7.62E-08 | 0.25  | deltapga  | etanercept |
| rs948138          | 11  | G  | MMP20,MMP27         | 115/272/177     | 0.445 | 6.56E-04 | 0.18  | deltadas  | etanercept |
| rs948138          | 11  | G  | MMP20,MMP27         | 342/849/518     | 0.449 | 2.13E-03 | 0.09  | deltapga  | all        |

## Supplementary Table 4

Chromatin interactions between treatment response SNPs and RA susceptibility SNPs. (\*) indicates promoter as well as region capture in that cell type, (\*\*) indicates promoter capture only. Low frequency variants are in red.

| Phenotype            | C-HiC data     | RA locus SNPs   | Chr | Best P   | SNP         | Minor allele frequency | Best Interaction score |
|----------------------|----------------|-----------------|-----|----------|-------------|------------------------|------------------------|
| DAS28-ESR infliximab | GM* & Jurkat   | <i>ANXA3</i>    | 4   | 6.00E-05 | rs1061400   | 0.170                  | 7.75                   |
| ESR infliximab       | GM* & Jurkat   | <i>ANXA3</i>    | 4   | 9.44E-05 | rs1061400   | 0.167                  | 7.75                   |
| DAS28-ESR infliximab | GM**           | <i>BLK</i>      | 8   | 4.49E-05 | rs77314514  | 0.048                  | 6.81                   |
| ESR infliximab       | GM* & Jurkat** | <i>BLK</i>      | 8   | 4.57E-05 | rs2645453   | 0.421                  | 12.71                  |
| ESR All              | GM* & Jurkat** | <i>BLK</i>      | 8   | 6.21E-05 | rs2645453   | 0.427                  | 12.71                  |
| SJC28 adalimumab     | GM*            | <i>C4orf52</i>  | 4   | 8.23E-05 | rs116577984 | 0.012                  | 15.68                  |
| ESR infliximab       | Jurkat         | <i>EOMES</i>    | 3   | 4.38E-05 | rs114990163 | 0.017                  | 6.40                   |
| TJC28 adalimumab     | GM             | <i>EOMES</i>    | 3   | 5.16E-05 | rs35112923  | 0.025                  | 6.89                   |
| PGA adalimumab       | Jurkat         | <i>EOMES</i>    | 3   | 9.31E-05 | rs114178819 | 0.019                  | 5.07                   |
| ESR adalimumab       | GM & Jurkat    | <i>IFNGR2</i>   | 21  | 8.71E-05 | rs139387252 | 0.016                  | 9.73                   |
| ESR All              | GM & Jurkat    | <i>IFNGR2</i>   | 21  | 8.89E-05 | rs139387252 | 0.018                  | 9.73                   |
| ESR adalimumab       | Jurkat**       | <i>MED1</i>     | 17  | 7.46E-06 | rs72823322  | 0.085                  | 5.23                   |
| DAS28-ESR All        | GM* & Jurkat   | <i>PADI4</i>    | 1   | 8.10E-05 | rs58218115  | 0.194                  | 9.00                   |
| DAS28-ESR adalimumab | GM             | <i>PRKCH</i>    | 14  | 5.07E-06 | rs45544631  | 0.016                  | 6.09                   |
| TJC28 adalimumab     | GM             | <i>PRKCH</i>    | 14  | 1.65E-05 | rs45544631  | 0.016                  | 6.09                   |
| DAS28-ESR etanercept | GM* & Jurkat   | <i>PTPRC</i>    | 1   | 3.40E-05 | rs77622698  | 0.035                  | 14.04                  |
| SJC28 All            | GM             | <i>RAD51B</i>   | 14  | 9.01E-05 | rs193127299 | 0.016                  | 11.15                  |
| SJC28 infliximab     | GM             | <i>RAD51B</i>   | 14  | 6.09E-10 | rs193127299 | 0.010                  | 11.15                  |
| TJC28 adalimumab     | GM & Jurkat    | <i>RAD51B</i>   | 14  | 4.48E-05 | rs17835200  | 0.058                  | 5.69                   |
| PGA All              | GM & Jurkat    | <i>RAD51B</i>   | 14  | 1.25E-05 | rs117314383 | 0.030                  | 6.29                   |
| DAS28-ESR All        | GM & Jurkat    | <i>RAD51B</i>   | 14  | 1.90E-05 | rs117314383 | 0.030                  | 22.66                  |
| SJC28 etanercept     | GM**           | <i>RCAN1</i>    | 21  | 4.34E-06 | rs117641308 | 0.017                  | 6.76                   |
| TJC28 adalimumab     | GM & Jurkat    | <i>RUNX1</i>    | 21  | 2.83E-06 | rs13047746  | 0.042                  | 29.51                  |
| SJC28 All            | GM             | <i>SPRED2</i>   | 2   | 5.71E-05 | rs897875    | 0.037                  | 5.53                   |
| DAS28-ESR All        | GM* & Jurkat*  | <i>TNFAIP3</i>  | 6   | 8.57E-05 | rs112862764 | 0.09                   | 6.03                   |
| DAS28-ESR All        | GM* & Jurkat*  | <i>TNFAIP3</i>  | 6   | 8.24E-05 | rs4896297   | 0.088                  | 8.70                   |
| ESR adalimumab       | GM             | <i>TNFRSF9</i>  | 1   | 3.24E-05 | rs2797685   | 0.173                  | 5.62                   |
| DAS28-ESR etanercept | GM**           | <i>TRAF1-C5</i> | 9   | 8.90E-05 | rs3762054   | 0.249                  | 5.70                   |

## Supplementary Figure 1

Histograms showing the raw distribution of  $\Delta\text{SJC28}$ ,  $\Delta\text{TJC28}$ ,  $\Delta\text{ESR}$ ,  $\Delta\text{PGA}$ , and  $\Delta\text{DAS28}$ . Note: the values were mean-centred and scaled to have a variance of 1 before linear regression (see Methods).

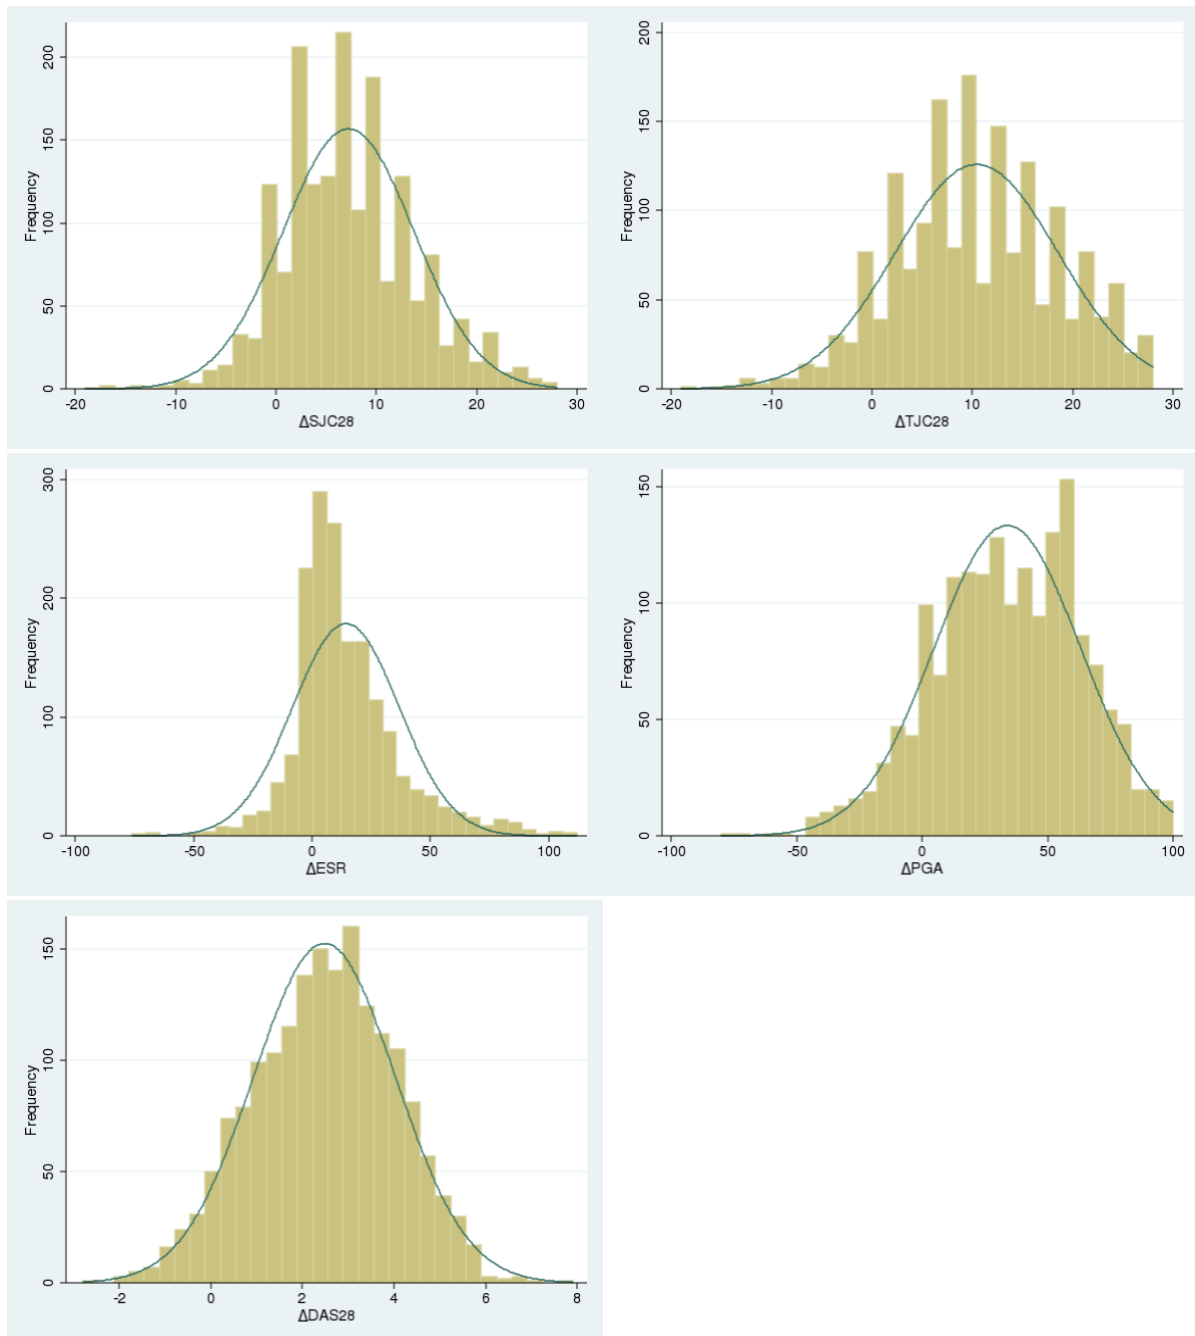

## Supplementary Figure 2

The Quantile-Quantile (QQ) plots for each analysis (A=SJC28, B=TJC28, C=ESR, D=PGA, E=DAS28)

**A**

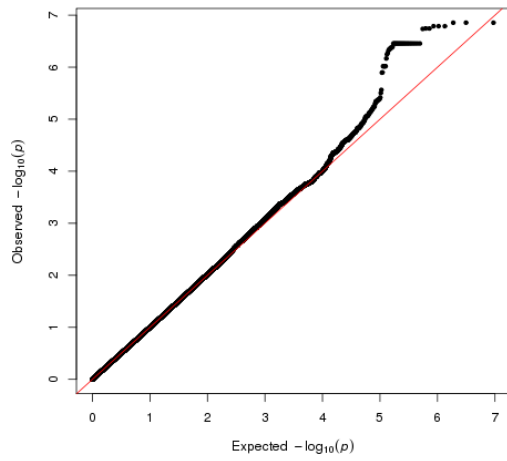

**B**

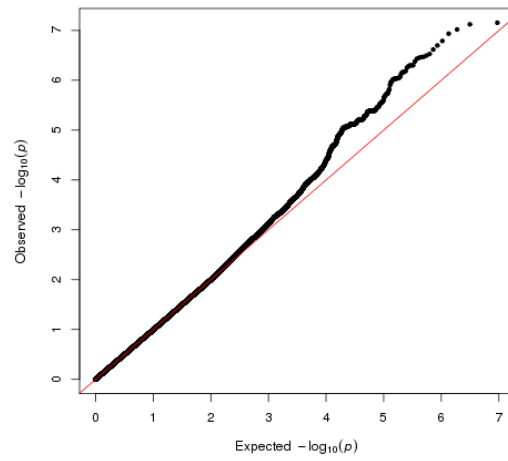

**C**

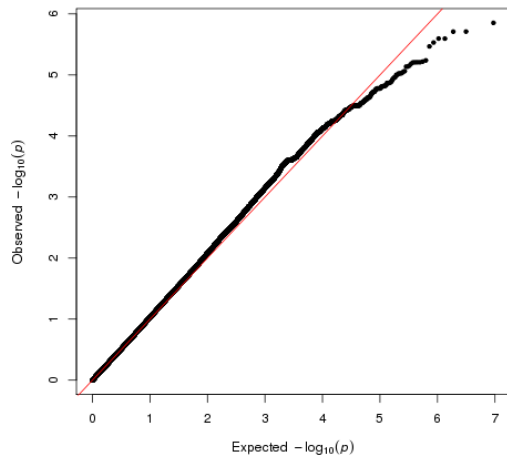

**D**

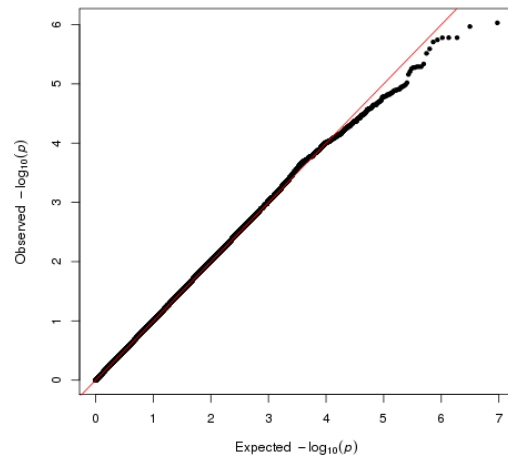

**E**

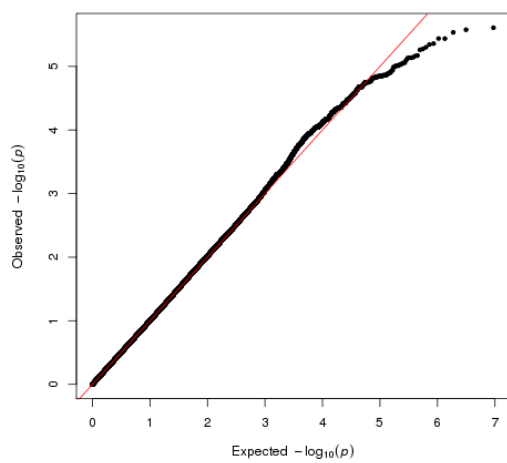

### Supplementary Figure 3

- A** Regional association plot for rs2187874 [purple diamond]  
 Circles represent SNPs in LD, with the colour representing the strength of LD as measured by  $r^2$  (see key). Genes are shown as horizontal lines at the bottom of the plot, with chromosomal position shown in Mb.

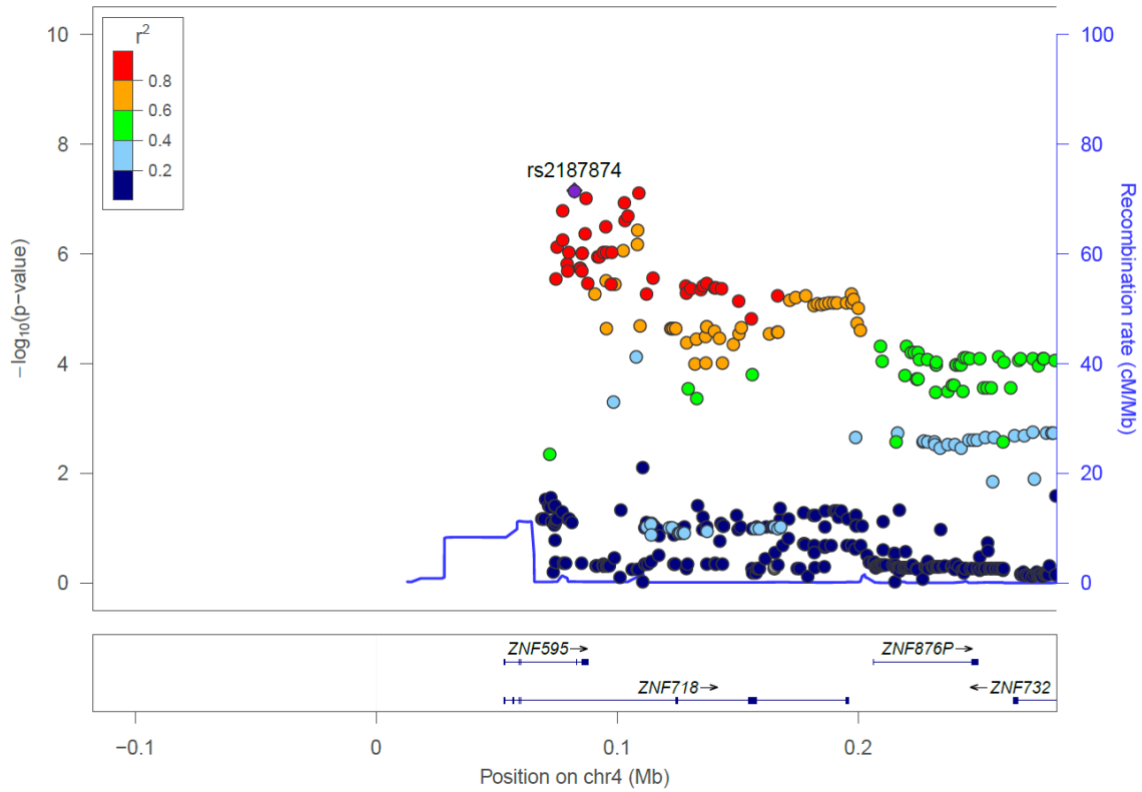

- B** Chromatin interactions in GM12878 cells with rs2187874 [in red]

rs2187874 in GM12878 Tissues

SNP Data:

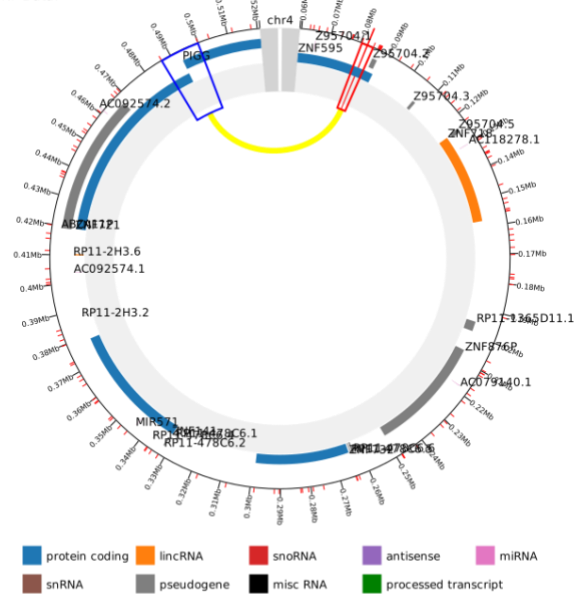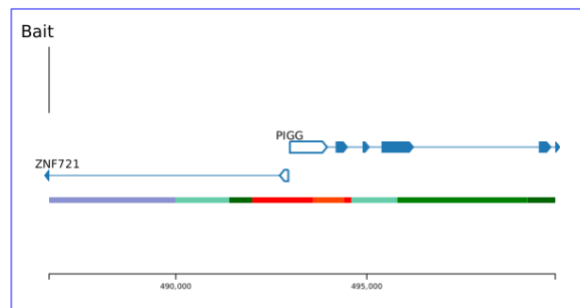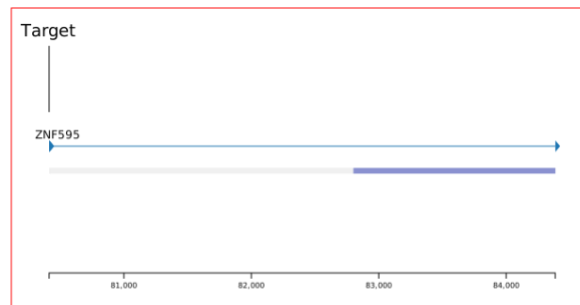



## Supplementary Figure 4

### A Regional association plot for rs7195994

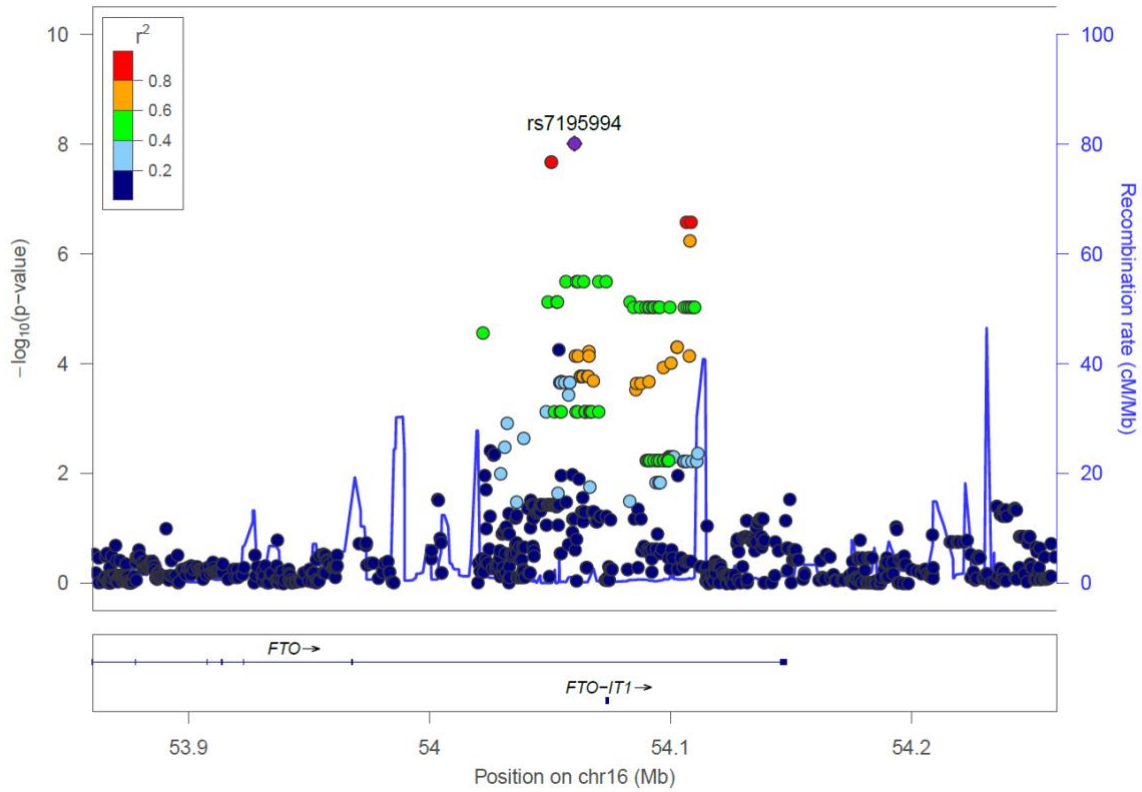

### B Chromatin interactions in GM12878 cells with rs2540767 [in red] (a SNP in LD with above)

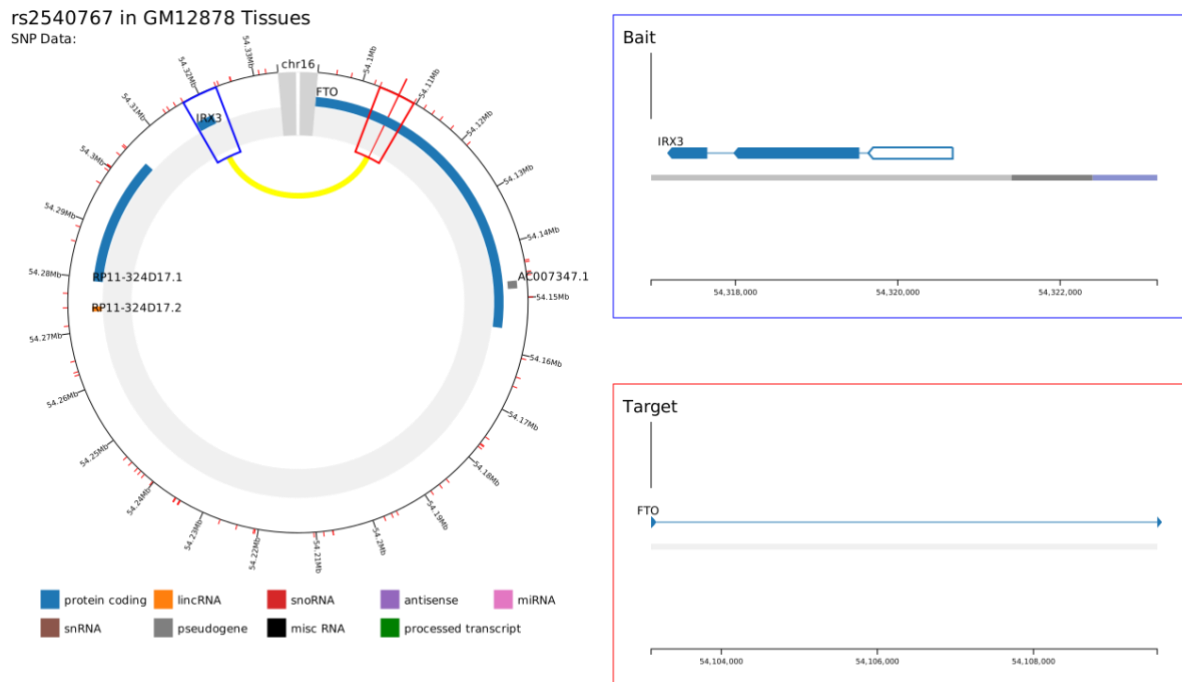

### Supplementary Figure 5

Regional association plot for rs11599217

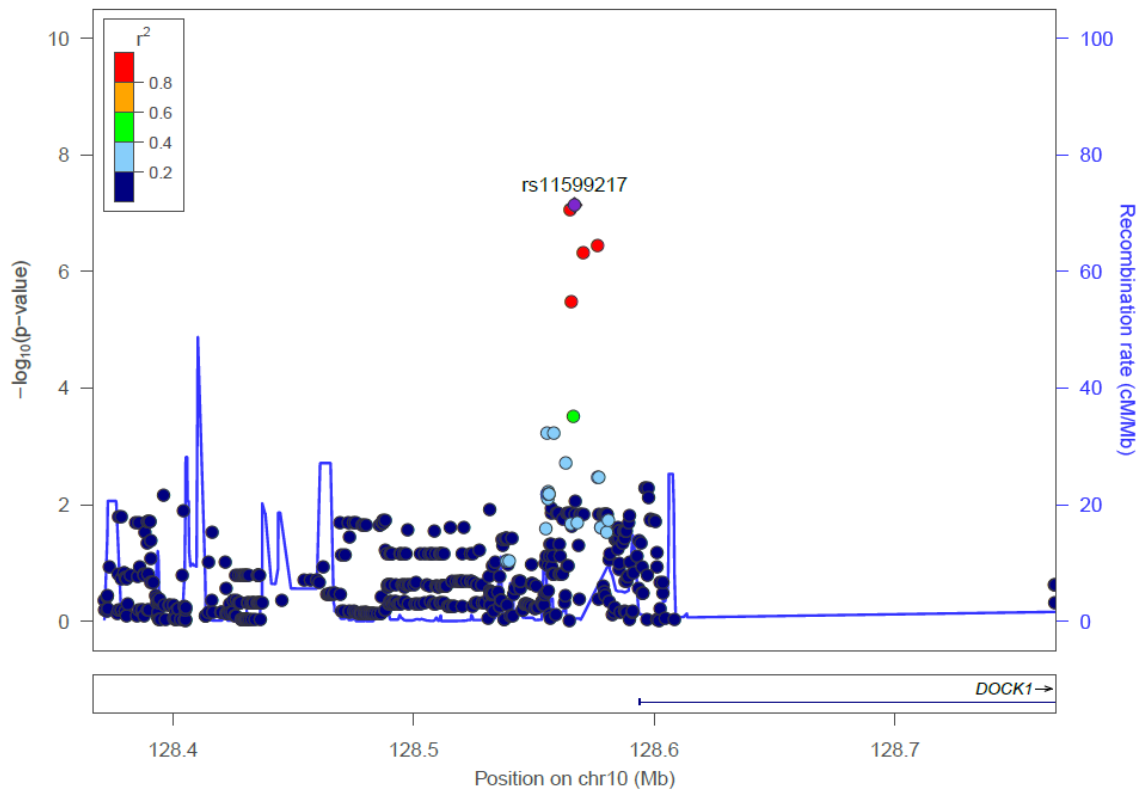

### Supplementary Figure 6

Regional association plot for rs10739537

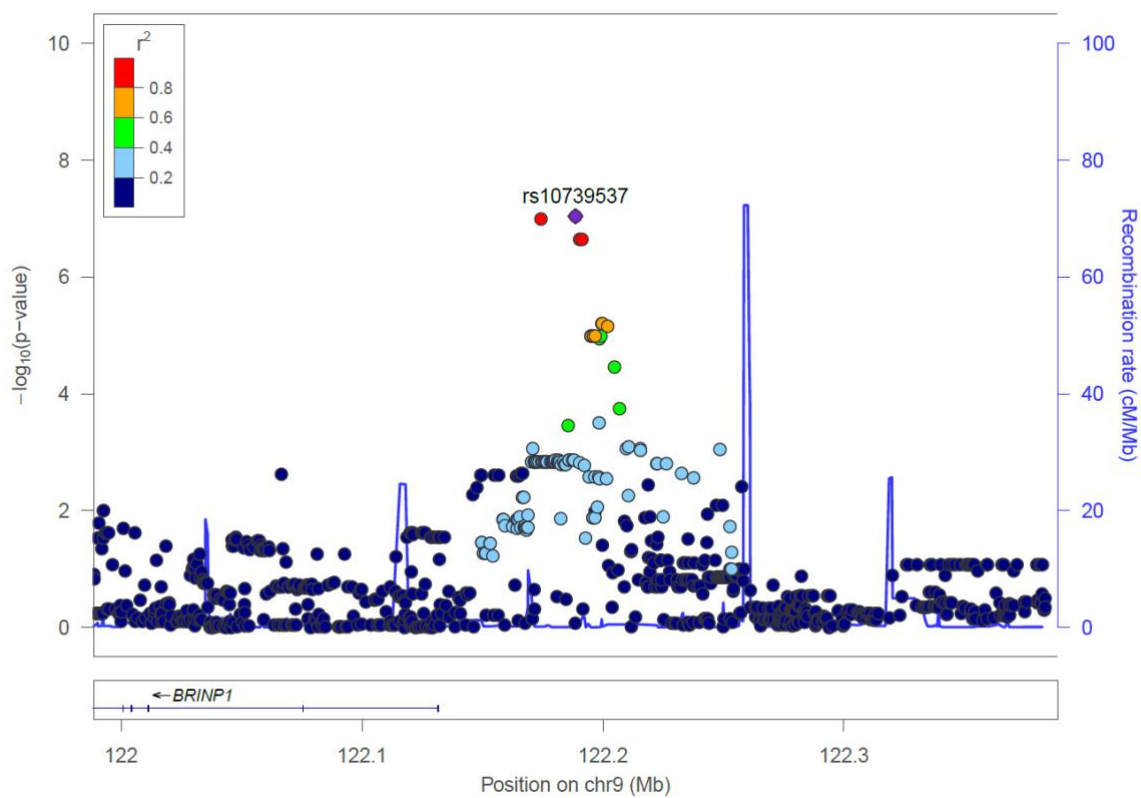

## Supplementary Figure 7

### A Regional association plot for rs948138

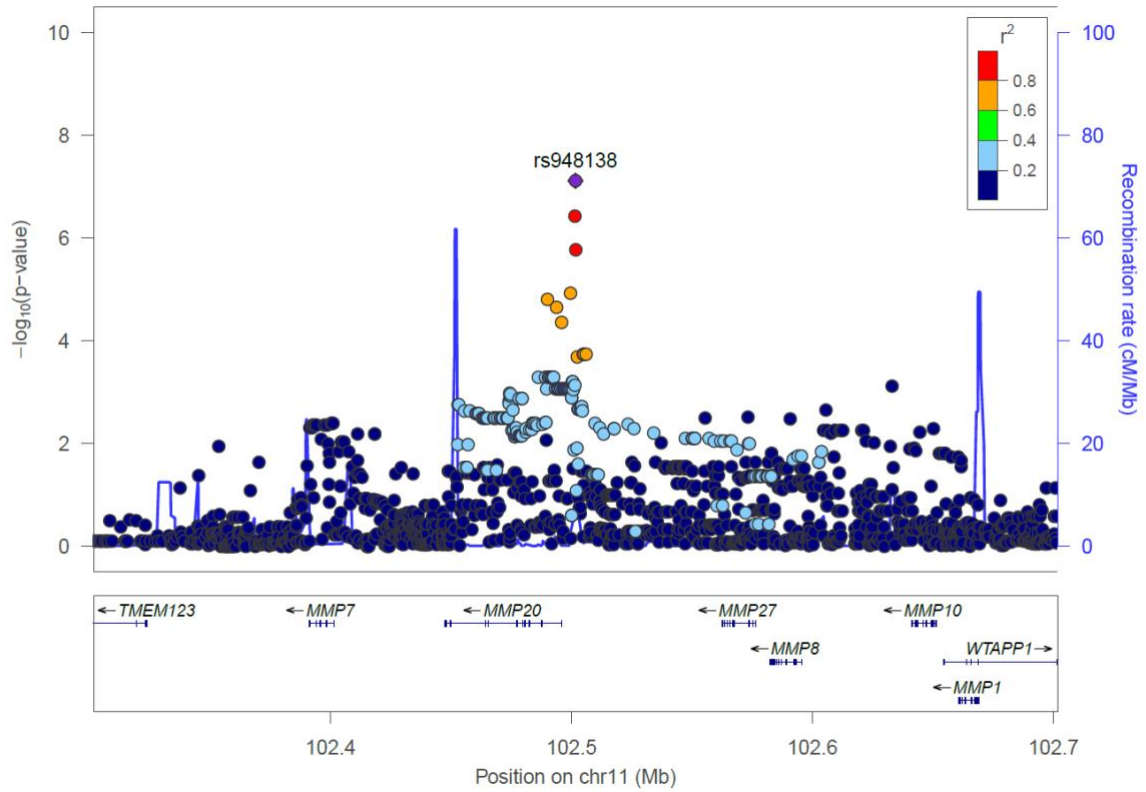

### B Chromatin interactions in Naive CD8 cells with rs948138 [in red]

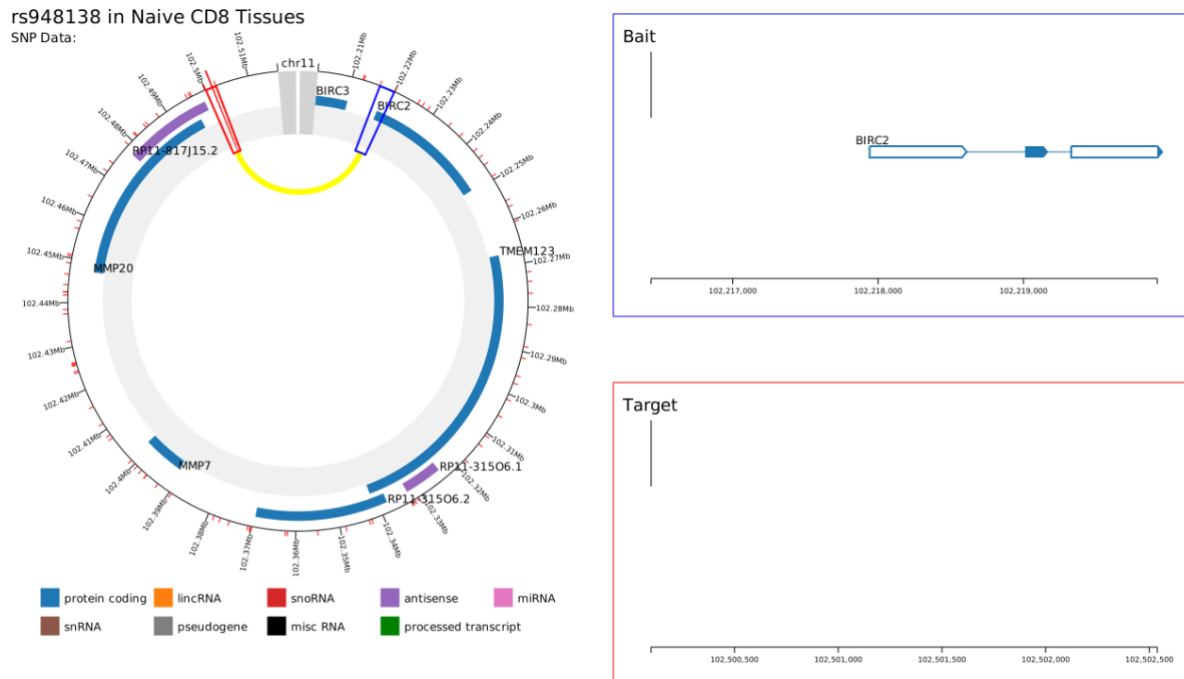

## Supplementary Figure 8

Capture HiC in-house data. Interaction (blue arc) is shown between the HindIII fragment containing the rs193127299 SNP (red line) and the RA susceptibility/risk SNPs (green).

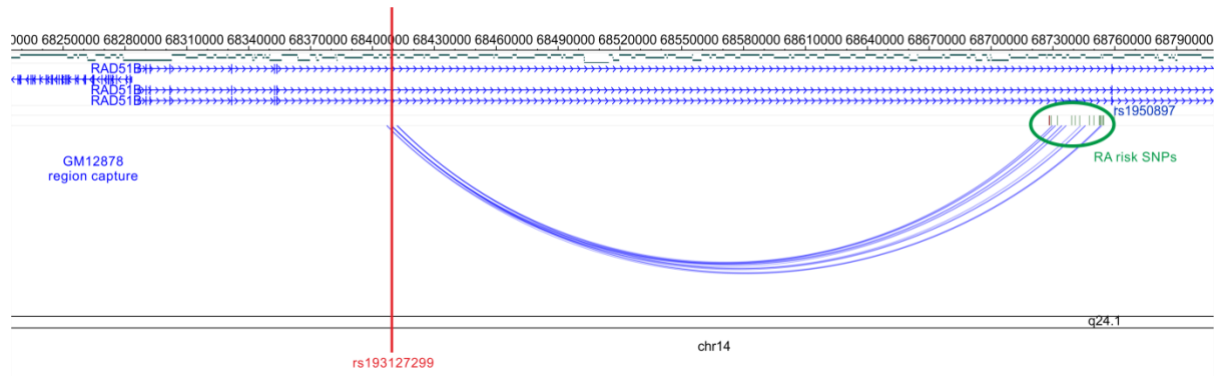

## Supplementary Figure 9

Posterior densities for the heritability of the DAS28 components

TNF $\alpha$  response is measured by the rank-transformed residuals of the 6-month change in each DAS component. The Genetic Relationship Matrix (GRM) is computed by taking the inner product between the vectors of genotypes for each pair of individuals, normalised to unit vectors. ESR and SJC28 response are heritable, with the 90% credible interval excluding 0. On the contrary, there is no evidence of nonzero heritability for TJC28 and PGA (VAS) response with the posterior density being concentrated towards 0.

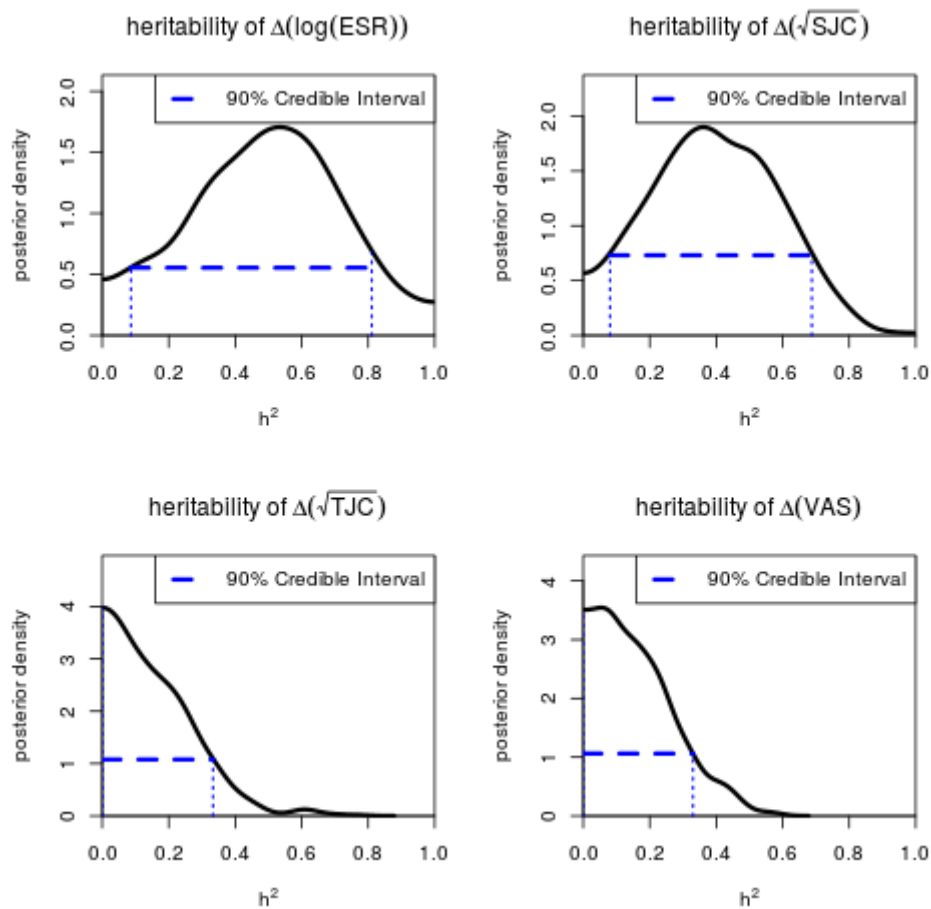

## Supplementary Figure 10

Comparison of GRM constructions and outcome transformations in estimating heritability of TNFi response. The middle of each box corresponds to the posterior mean for the Bayesian model and to the REML point estimate for GCTA. The top and bottom of the box correspond to the middle plus/minus one standard deviation for the Bayesian model and plus/minus one standard error for GCTA. For the Bayesian model, the whiskers correspond to the 90% credible interval.

“p0” denotes a GRM without pre-scaling of SNPs to unit variance, while “p1” denotes a GRM with pre-scaling. The former construction assumes that SNP effect sizes are independent of the minor allele frequency, while the latter construction assumes that rarer SNPs have larger effect sizes and is the default construction in GCTA. The grouping corresponds to untransformed (“no”) and rank-transformed (“rank”) residuals of the 6-month change.

Results from the Bayesian model are consistent with those from GCTA. The effect of the rank-transformation is small. On the other hand, the GRM construction is important. Scaling of the SNPs to unit variance (“p1”) leads to higher estimates for heritability. In the main text we report the more conservative estimates based on the “p0” GRM construction.

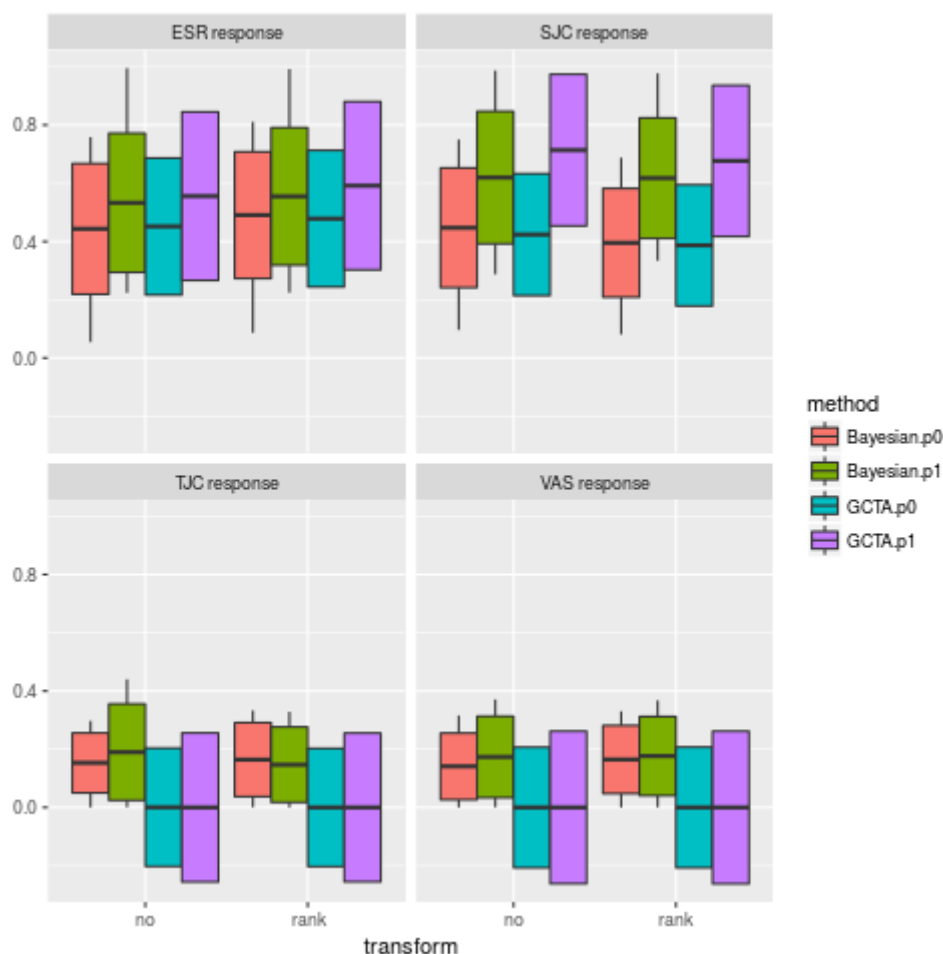

**Members of the Biologics in Rheumatoid Arthritis Genetics and Genomics Study Syndicate (BRAGGSS)**

***Steering Committee members: Professor Anne Barton, Professor John Isaacs, Professor Ann Morgan, Professor Gerry Wilson***

Barts Health NHS Trust (Prof C Pitzalis)

Basingstoke & North Hampshire NHS Foundation Trust (Dr E Williams, Dr R K Moitra, Dr D J Shawe)

Burton Hospitals NHS Foundation Trust (Dr M Nisar)

Central Manchester University Hospitals NHS Foundation Trust

- **Manchester Royal Infirmary** (Prof I Bruce, Prof A Barton, Dr R Gorodkin, Dr P Ho, Dr K Hyrich)
- **Trafford General** (Dr F McKenna)

Chesterfield Royal Hospital NHS Foundation Trust (Dr K Fairburn)

Countess of Chester Hospital NHS Foundation Trust (Dr J Nixon, Dr T Barnes, Dr M Hui)

City Hospitals Sunderland NHS Foundation Trust (Dr D Coady, Dr D Wright, Dr C Morley, Dr G Raftery, Dr C Bracewell)

County Durham and Darlington NHS Foundation Trust (Dr R Reece, Dr. D. Armstrong, Dr. A J Chuck, Dr. S Hailwood, Dr N Kumar, Dr D Ashok,)

Derby Hospitals NHS Foundation Trust (Dr. S C O'Reilly, Dr T Ding, Dr. L J Badcock, Dr. C M Deighton, Dr N Raj, Dr. M R Regan, Dr. G D Summers, Dr. R A Williams)

Gateshead Health NHS Foundation Trust (Dr. C A Kelly, Dr. J Hamilton, Dr. C R Heycock, Dr V Saravanan)

Harrogate & District NHS Foundation Trust (Dr M Green, Dr A Gough, Dr C Lawson)

Kettering General Hospital NHS Foundation Trust (Dr A Kuttikat, Dr D Parthajit, Dr E Borbas, Dr T Wazir)

Leeds Teaching Hospitals NHS Trust (Prof. P Emery, Dr. S. Bingham, Prof. A. Morgan, Prof H A Bird, Prof P G Conaghan, Dr C T Pease, Dr R J Wakefield, Prof. M Buch, Dr S Dass)

Northumbria Healthcare NHS Foundation Trust (Dr F N Birrell, Dr P R Crook)

Northern Lincolnshire and Goole Hospitals NHS Foundation Trust (Dr B Szebenyi, Dr D Bates, Dr D James, Dr T Gillott, Dr A Alvi, C Grey, J Browning)

Nottingham University Hospitals NHS Trust (Dr. J F McHale, Dr. I C Gaywood, Dr. A C Jones, Dr. P Lanyon, Dr. I Pande, Prof. M Doherty, Dr. A Gupta, Dr. P A Courtney, Dr A Srikanth, Dr A Abhishek)

Pennine Acute Hospitals NHS Trust –

- **North Manchester General Hospital** (Dr L Das, Dr. M Patrick, Dr. H N Snowden, Dr A P Bowden, Dr E E Smith, Dr P Klimiuk, Dr D J Speden )
- **Fairfield Hospital** (Dr L Das)

Portsmouth Hospitals NHS Trust (Dr. J M Ledingham, Dr. R G Hull, Dr. F McCrae, Dr. A Cooper, Dr S A Young Min, Dr Wong, Dr Shaban)

Royal Cornwall Hospitals NHS Trust (Prof A D Woolf, Dr M Davis, Dr D Hutchinson, Dr A Endean)

Royal Liverpool and Broadgreen University Hospitals NHS Trust (Dr D Mewar, Dr E J Tunn, Dr K Nelson, Dr T D Kennedy, Dr C Dubois)

Royal National Hospital for Rheumatic Diseases NHS Foundation Trust (Dr J Pauling, Dr E Korendowych, Dr T Jenkinson, Dr R Sengupta, Dr A Bhalla, Prof N McHugh, Dr W Tillett, Dr T Ahmed)

Salford Royal NHS Foundation Trust (Dr. H Chinoy, Prof T O'Neil, Prof A Herrick, Prof A Jones, Dr R Cooper, Dr W Dixon, Dr B Harrison)

Sheffield Teaching Hospitals NHS Foundation Trust (Dr. M Akil, Dr. S Till, Dr L Dunkley, Dr R Tattersall, Dr R Kilding, Dr T Tait, Dr J Maxwell, Dr K-P Kuet)

South Tees Hospitals NHS Foundation Trust (Dr. M J Plant, Dr. F Clarke, Dr. J N Fordham, Dr S Tuck, Dr S K Pathare, Dr A Paul)

South Warwickshire General Hospital NHS Trust (Dr. C P Marguerie, Dr S P Rigby, Dr N Dunn)

Staffordshire & Stoke-on-Trent Partnership NHS Trust (Dr S Hider, Dr A Menon, Dr C Dowson, Dr S Dutta, Dr S Kamath, Dr J Packham, Dr S Price, Dr E Roddy, Dr Z Paskins, Professor A. Hassell)

Stockport NHS Foundation Trust (Dr A Ismail, Dr C Filer)

St Helens and Knowsley Hospitals NHS Trust (Dr. R Abernethy, Dr A R Clewes, Dr. J K Dawson)

The Dudley Group of Hospitals NHS Foundation Trust (Prof G Kitas, Dr N Erb, Dr R Klocke, Dr A J Whallett, Dr K Douglas, Dr A Pace, Dr R Sandhu, Dr H John)

The Ipswich Hospital NHS Trust (Dr S Lane)

The Newcastle upon Tyne Hospitals NHS Foundation Trust (Prof. J D Isaacs, Prof. H Foster, Dr. B Griffiths, Dr. I Griffiths, Dr L Kay, Dr W-F Ng, Dr. P N Platt, Dr. D J Walker, Dr P Peterson, Dr A Lorenzi, Dr M Friswell, Dr B Thompson, Dr M Lee, Dr A Pratt)

The Royal Wolverhampton Hospitals NHS Trust

- **Cannock Chase Hospital** (Dr. D Mulherin, Dr. S V Chalam, , Dr. T Price, Dr. T Sheeran, Dr S Venkatachalam, Dr S Baskar)
- **New Cross Hospital** (Dr Sabrina Raizada)

University Hospital Birmingham NHS Foundation Trust (Dr A Filer, Dr. Bowman, Dr. P Jobanputra Dr. E C Rankin)

University Hospitals of Coventry and Warwickshire NHS Trust (Dr S Dubey, Dr. K Chaudhuri, Dr A Price-Forbes, Dr J Ravindran)

University Hospitals of Leicester NHS Trust (Dr A Moorthy, Dr P Sheldon, Dr W Hassan, Dr J Francis, Dr A Kinder, Dr R Neame)

University Hospitals of Morcambe Bay NHS Trust

- Royal Lancaster Hospital (Dr. M Bukhari, Dr L Ottewell, Dr Palkonyai)
- Furness General Hospital (Dr M Bukhari)

West Suffolk Hospitals NHS Trust (Dr D T O'Reilly, Dr V Rajagopal,)

Wrightington, Wigan and Leigh Hospitals NHS Foundation Trust (Dr E Gladston Chelliah)

York Teaching Hospitals NHS Foundation Trust

- **York District Hospital** (Dr M Green, Dr M Quinn, Dr A Isdale, Dr A Brown, Dr B Saleem)
- **Scarborough Hospital** (Dr Z Al-Saffar, Dr G Koduri)



## Members of the MAXimizing Therapeutic Utility in RA (MATURA) consortium

| <b>Name</b>              | <b>Institution</b>              |
|--------------------------|---------------------------------|
| <b>Work Stream 1</b>     |                                 |
| Prof Costantino Pitzalis | Queen Mary University of London |
| Prof Peter Taylor        | University of Oxford            |
| Prof Ernest Choy         | Cardiff University              |
| Prof Iain McInnes        | University of Glasgow           |
| Dr Mike Barnes           | Queen Mary University of London |
| Prof John Isaacs         | Newcastle University            |
| Prof Christopher Buckley | University of Birmingham        |
| Prof Michael Ehrenstein  | University College London       |
| Prof Peter Sasieni       | Queen Mary University of London |
|                          |                                 |
|                          |                                 |
| <b>Work Stream 2</b>     |                                 |
| Prof Anne Barton         | University of Manchester        |
| Prof Ann Morgan          | University of Leeds             |
| Prof Gerry Wilson        | University College Dublin       |
| Prof Paul McKeigue       | University of Edinburgh         |
| Prof Heather Cordell     | Newcastle University            |
| Prof Jenny Barrett       | University of Leeds             |
| Prof Andrew Cope         | Kings College London            |
| Prof Adam Young          | University of Hertfordshire     |
| Prof Karim Raza          | University of Birmingham        |
| Prof Katherine Payne     | University of Manchester        |
| Prof Jane Worthington    | University of Manchester        |
| Prof Deborah Symmons     | University of Manchester        |
| Prof Kimme Hyrich        | University of Manchester        |
| Prof Ian Bruce           | University of Manchester        |
|                          |                                 |
| <b>Industry</b>          |                                 |
| Martin Hodge             | Pfizer                          |
| Anthony Rowe             | Janssen                         |
| Jeffrey Siegel           | Roche/Genentech                 |
| Michelle Mao             | BGI                             |
| Richard Watts            | Qiagen                          |
| Carolyn Cuff             | Abbvie                          |
| David Close              | MedImmune                       |
| Philippe Coterell        | Avacta                          |
| Felix Agakov             | Pharmatics                      |
